# Supplementary material for: Elevated H3K4me3 Through MLL2-WDR82 upon Hyperglycemia Causes Jagged Ligand Dependent Notch Activation to Interplay with Differentiation State of Endothelial Cells
Source: PubMed Central journal article supplement (PMC8982561; doi:10.3389/fcell.2022.839109), 2022-03-22
Supplement: DataSheet1.pdf [file DataSheet1.pdf]

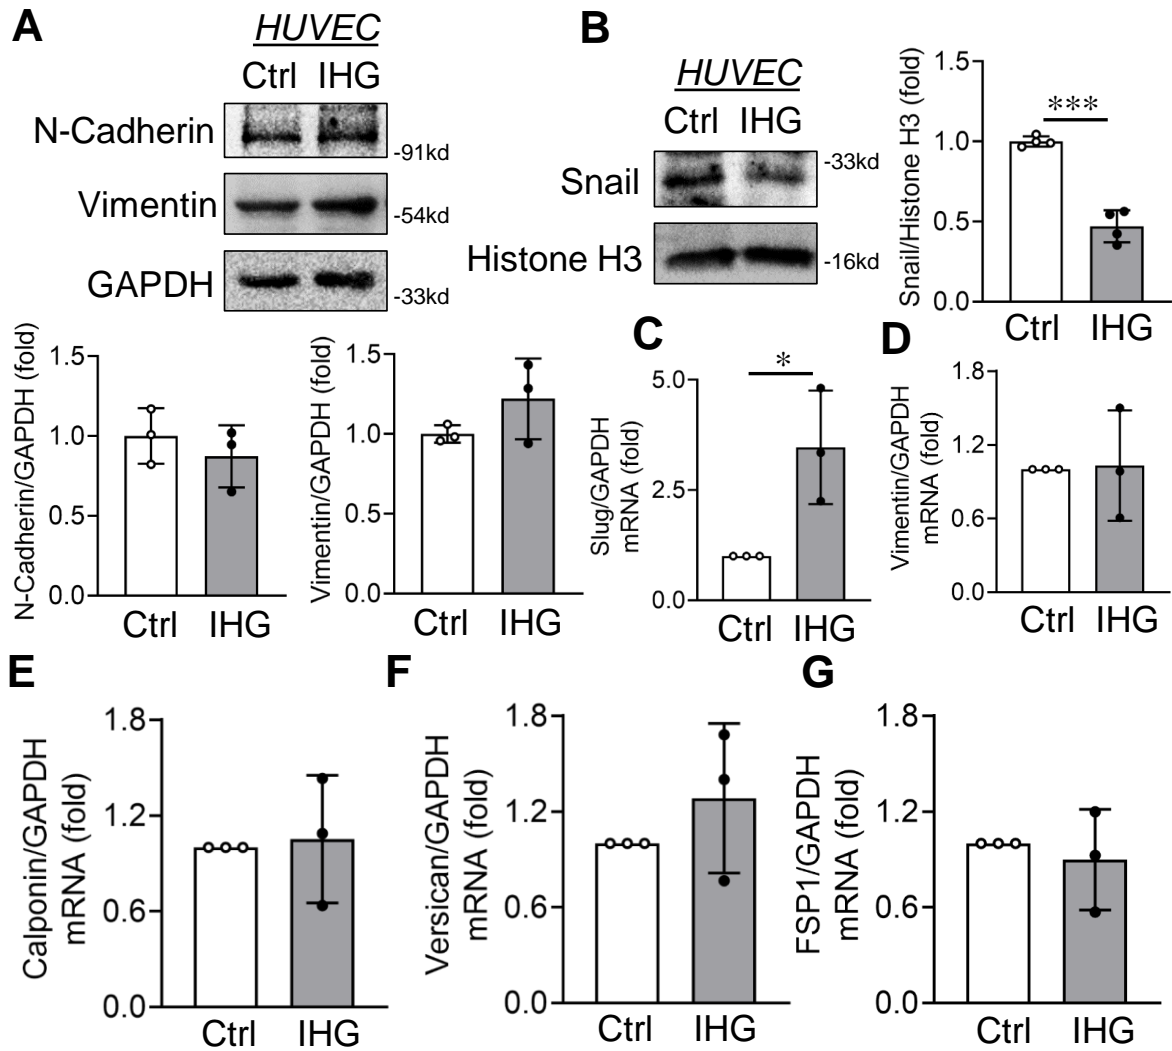

**Supplemental Figure 1. Intermittent high glucose did not alter the level of many EndMT associated genes.** (A-B) Immunoblot analysis of HUVEC exposed to intermittent high glucose followed measuring the level of N-Cadherin (A), Vimentin (A) and Snail (B). (C-G) Transcript level expression of genes; *Slug* (C), *Vimentin* (D), *Calponin* (E), *Versican* (F) and *FSP1* (G) in HUVEC challenged with intermittent high glucose. \*\*\* $p < 0.001$ , by unpaired t-test.

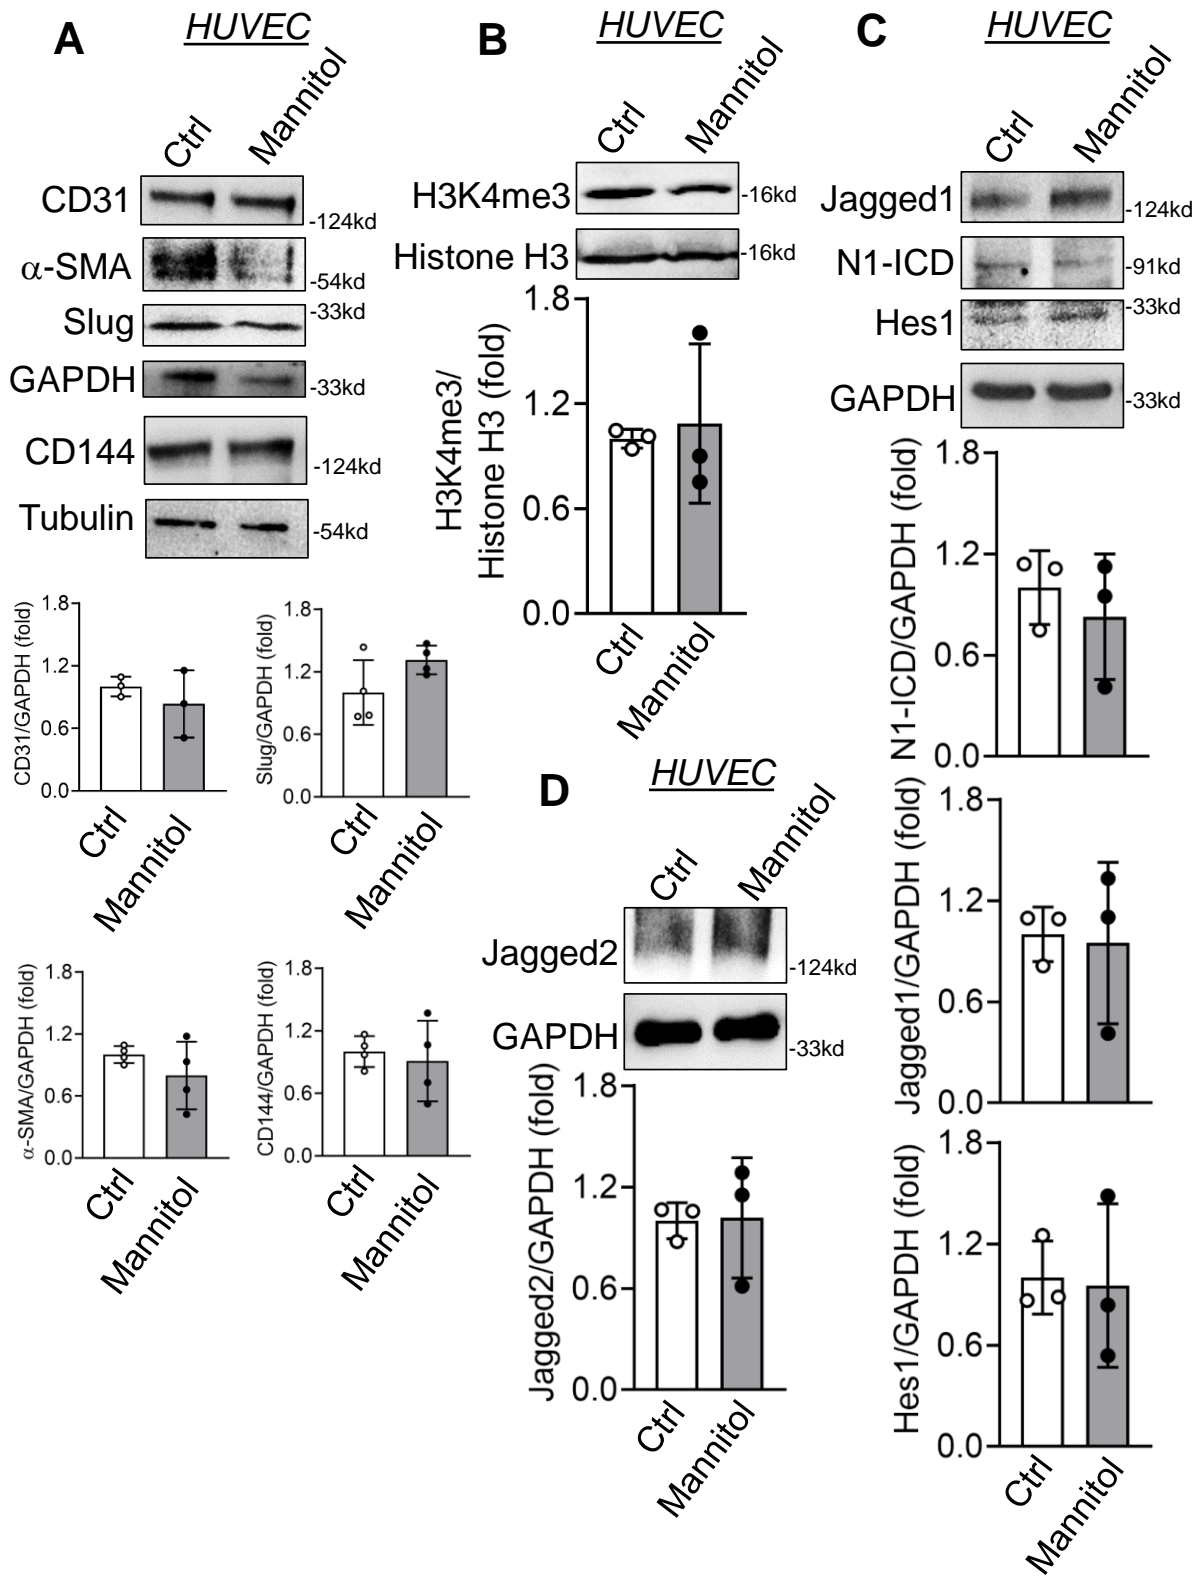

**Supplemental Figure 2. Osmolality changes imparted through D-mannitol treatment do not alter EndMT and Notch signaling changes.** (A) HUVEC were exposed to intermittent high glucose for three days followed by incubation for extended two days prior to assessing the level of CD31,  $\alpha$ -SMA, Slug, CD144 through immunoblot analysis. (B-D) Immunoblot analysis of HUVEC lysates collected from cells treated with intermittent high mannitol treatment conditions (as comparable to glucose level) and probed for H3K4me3 (B), Jagged1 (C), N1-ICD (C), Hes1 (C), and Jagged2 (D) along with densitometry quantification.

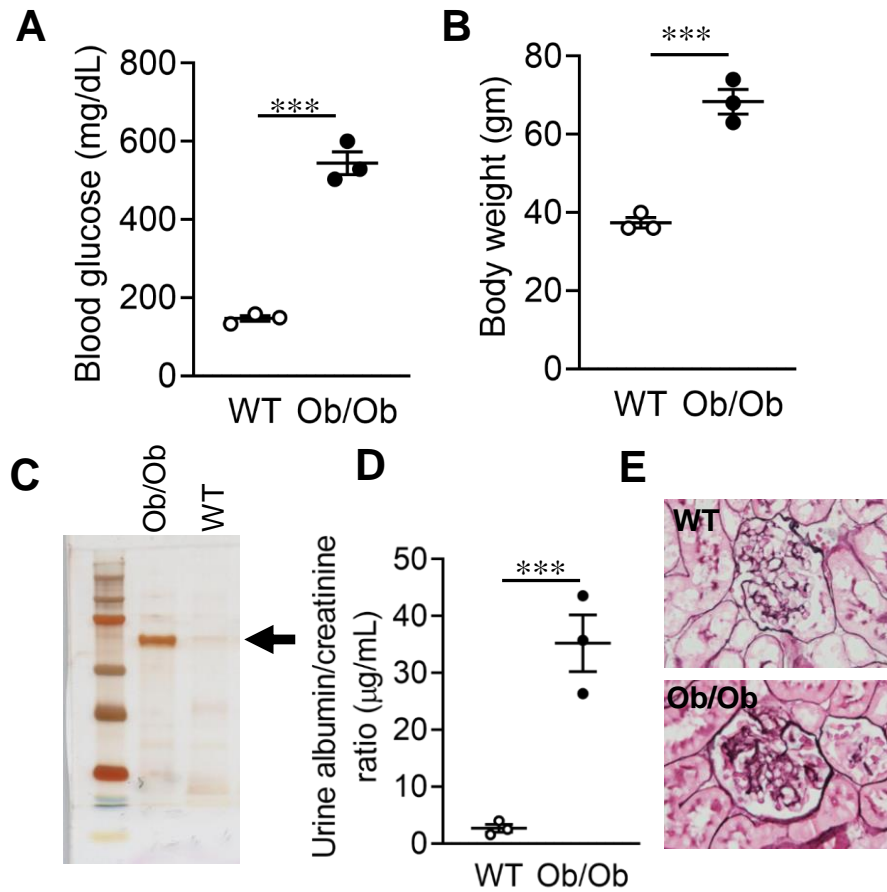

**Supplemental Figure 3. Ob/Ob mice exhibited biochemical markers of glomerular dysfunction.** (A-B) Random blood glucose (A) and body weight (B) at 14 weeks of age of WT and Ob/Ob mice. (C) Silver stained SDS-PAGE gel of urine samples collected from 14 weeks old WT and Ob/Ob mice. (D) Albumin to Creatinine ratio (ACR) analysis of urine samples collected from male WT and Ob/Ob mice of 14 weeks of age. (E) Representative images of male WT and Ob/Ob mice kidney tissues stained with Periodic acid–Schiff and Silver stain. (n=3) \*\*\*p < 0.001, by unpaired t test.

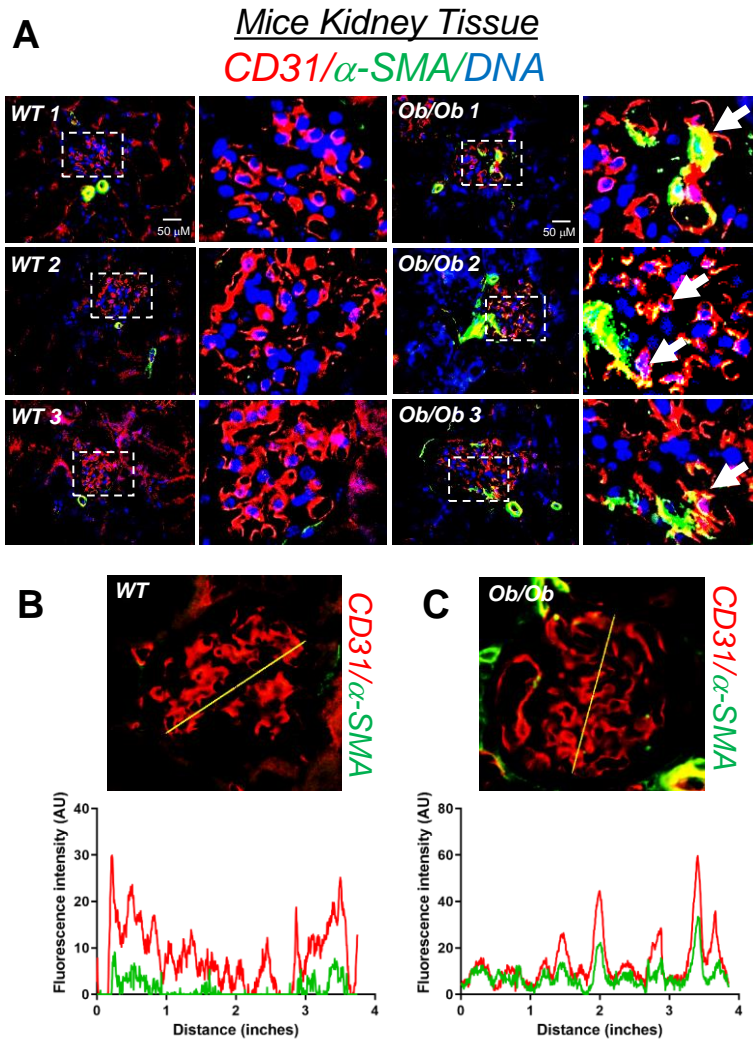

**Supplemental Figure 4. Glomerular endothelial cells co-expressed CD31 and  $\alpha$ -SMA in kidney section of Ob/Ob mice.** (A) Immunohistochemistry of tissue sections from BTBR WT and BTBR Ob/Ob mice stained for  $\alpha$ -SMA and CD31 (n=3). DAPI staining is shown in blue. White arrowheads indicate endothelial cells expressing both CD31 and  $\alpha$ -SMA. (B-C) Line graph indicating pixel-wise intensities of green and red fluorescence in the yellow line highlighted areas within the image.

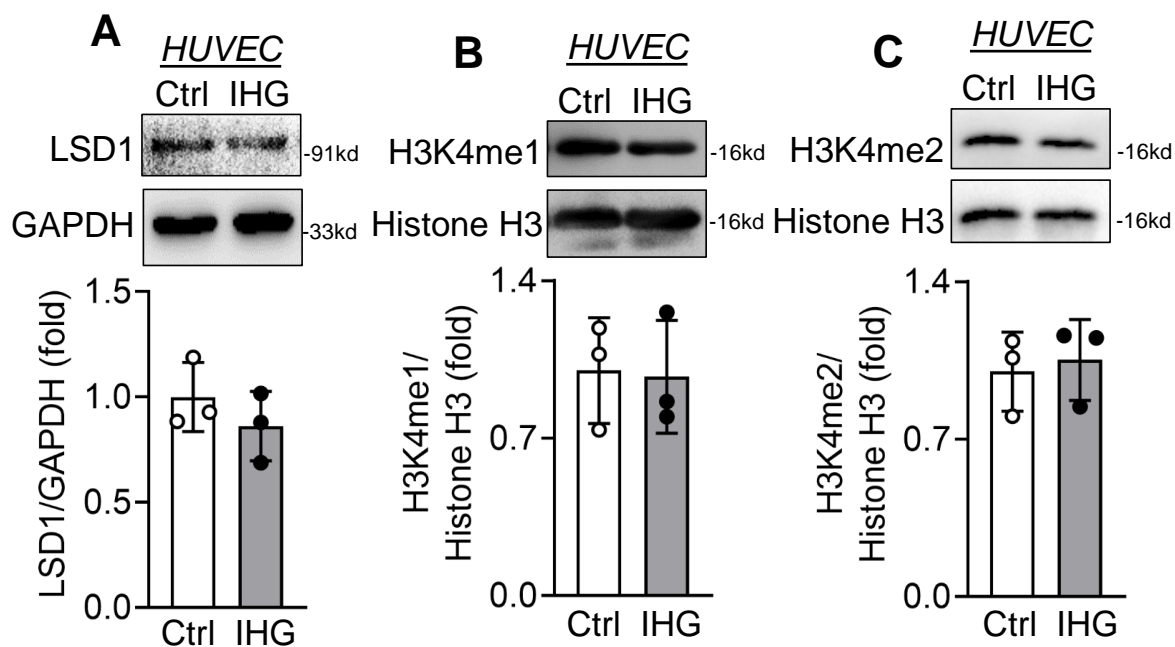

**Supplemental Figure 5. Intermittent hyperglycemia do not alter H3K4 associated demethylase or its downstream targets H3K4me1 and H3K4me2.** (A-C) Immunoblot analysis of HUVEC lysates collected from cells treated with intermittent high glucose treatment conditions and probed for Lsd1 (A), H3K4me1 (B), and H3K4me2 (C) along with densitometry quantification.

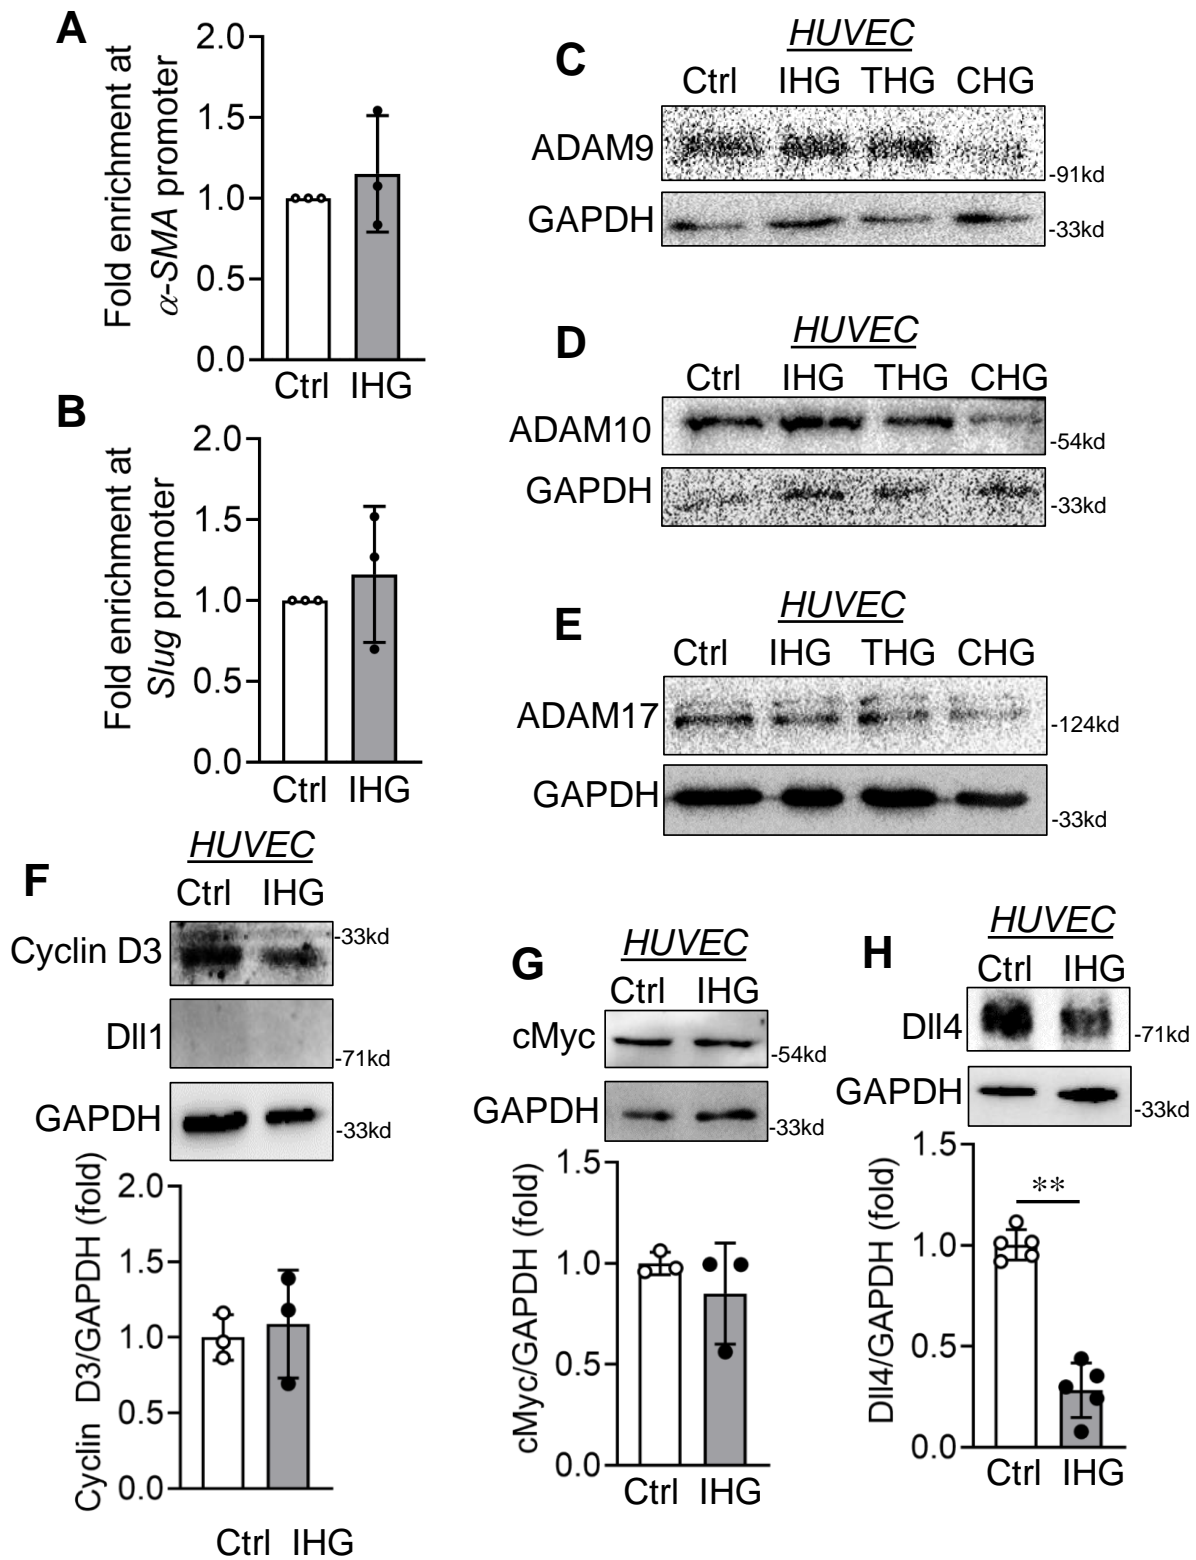

**Supplemental Figure 6. Intermittent high glucose exposure induced H3K4me3 did not enrich into  $\alpha$ -SMA and *Slug* gene promoters as well as did not alter the expression of Notch-**

**associated ADAM-family of metalloproteinase while reducing the expression of Notch ligands Dll4.** (A-B) ChIP-qPCR analysis of H3K4me3 enrichment on  *$\alpha$ -SMA* (A, n=3) and *Slug* (B, n=3) gene promoters in HUVEC exposed to intermittent hyperglycemia. (C-E) Immunoblot analysis of endothelial cell lysates collected from HUVEC treated with intermittent, transient, and constant high glucose and probed for ADAM9 (C), ADAM10 (D), ADAM17 (E). (F-H) Immunoblot analysis of HUVEC lysates collected from cells exposed to intermittent high glucose treatment conditions and probed for Cyclin D3 (F), Dll1 (F), cMyc (H), and Dll4 (G). \*\*p < 0.01, by unpaired t test.



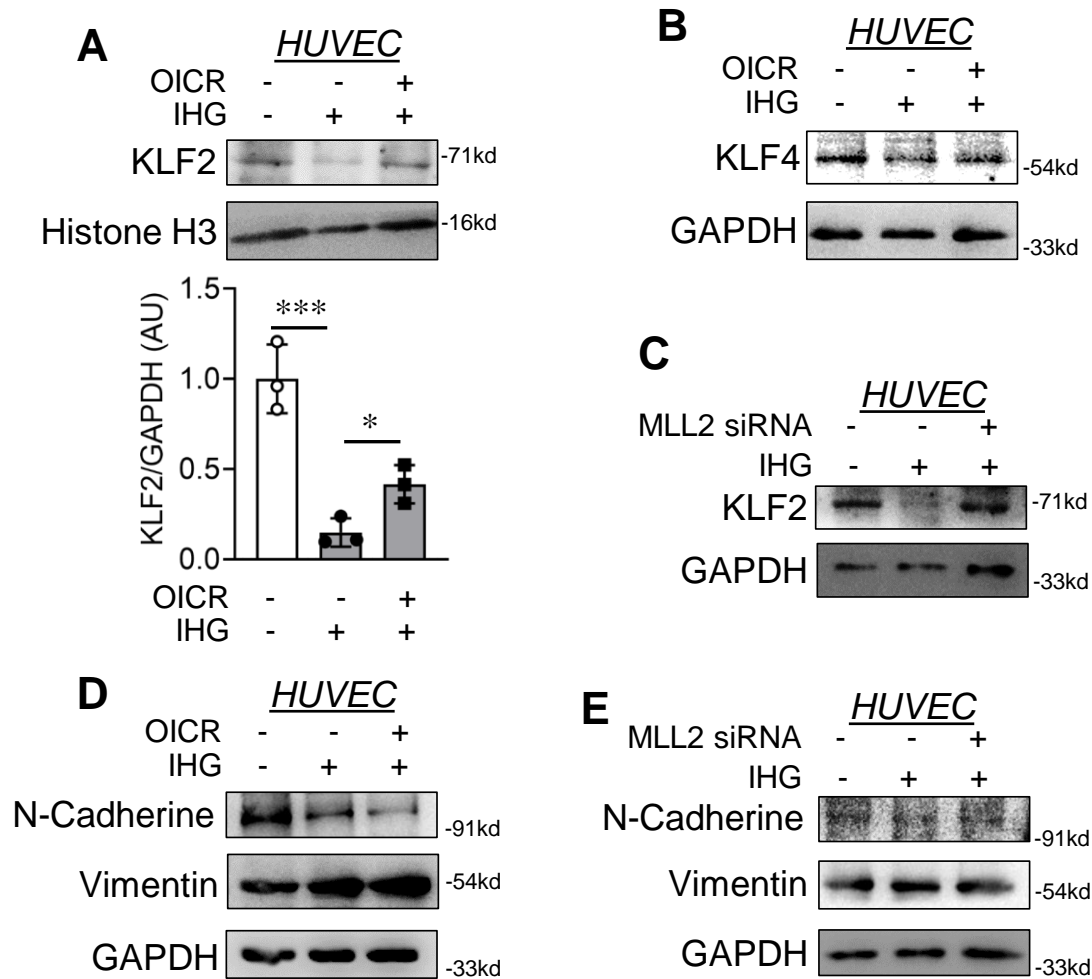

**Supplemental Figure 7. Catalytic inhibition or siRNA-mediated knock down of MLL blocked intermittent high glucose dependent reduction in KLF2 level without much altering KLF4.** (A-E) Immunoblot analysis of endothelial cell lysates collected from HUVEC treated with intermittent high glucose and OICR (A,B,D) and/or MLL2 siRNA (C,E) probed for KLF2 (A,C), KLF4 (B), N-Cadherin and vimentin (D-E) ). HUVEC in which KLF2 and KLF4 were detected cells were exposed to three days of intermittent high glucose exposure while cells whereas for cells where N-cadherin and vimentin were detected, HUVEC are exposed to five days treatment conditions. \* $p < 0.05$  and \*\*\* $p < 0.001$ , by Two-stage linear step-up procedure of Benjamin, Krieger and Yekutieli test.
