# Supplementary material for: Elevated H3K4me3 Through MLL2-WDR82 upon Hyperglycemia Causes Jagged Ligand Dependent Notch Activation to Interplay with Differentiation State of Endothelial Cells
Source: PubMed Central journal article supplement (PMC8982561; doi:10.3389/fcell.2022.839109), 2022-03-22
Supplement: DataSheet2.pdf [file DataSheet2.pdf]

**Supplemental Table 1. List of Antibodies**

| <b>Antibody name</b>                                                | <b>Catalogue no.</b>                 |
|---------------------------------------------------------------------|--------------------------------------|
| <b>Immunofluorescence cell studies</b>                              |                                      |
| Alpha-Smooth Muscle Actin (D4K9N) XP(R) Antibody                    | 19245 (CST)                          |
| Anti-VE-cadherin mouse antibody (F-8)                               | 9989 (Santa Cruz)                    |
| Goat anti-Mouse Secondary Antibody, Alexa Fluor 488                 | A11001 (Thermo Fisher Scientific)    |
| Goat anti-Rabbit Secondary Antibody, Alexa Fluor 555                | A32732 (Thermo Fisher Scientific)    |
| <b>mouse kidney immunofluorescence studies</b>                      |                                      |
| CD31 Rabbit monoclonal antibody, 1:50                               | 77699 (CST)                          |
| H3K4me3 Rabbit monoclonal antibody, 1:50                            | 9751 (CST)                           |
| Alpha smooth muscle actin Rabbit polyclonal antibody, 1:200         | ab5694 (Abcam)                       |
| Rhodamine Red-X-conjugated AffiniPure Fab Fragment Goat Anti-Rabbit | 111-297-003 (Jackson ImmunoResearch) |
| Alexa Fluor 488-conjugated AffiniPure Fab Fragment Goat Anti-Rabbit | 111-547-003 (Jackson ImmunoResearch) |
| <b>Immunoblotting studies</b>                                       |                                      |
| Cyclin D3 (DCS22) Mouse monoclonal antibody                         | 2936 (CST)                           |
| HES1 (D6P2U) Rabbit monoclonal antibody                             | 11988 (CST)                          |
| Cleaved Notch1 (Val1744) (D3B8) Rabbit monoclonal antibody          | 4147 (CST)                           |
| ADAM9 (D64B5) Rabbit monoclonal antibody                            | 4151 (CST)                           |
| DLL4 Rabbit Polyclonal Antibody                                     | 2589 (CST)                           |
| DLL1 Rabbit Polyclonal Antibody                                     | 2588 (CST)                           |
| Jagged1 (28H8) Rabbit monoclonal antibody                           | 2620 (CST)                           |
| Jagged2 (C23D2) Rabbit monoclonal antibody                          | 2210 (CST)                           |

|                                                                          |                                      |
|--------------------------------------------------------------------------|--------------------------------------|
| TACE (D22H4) Rabbit monoclonal antibody                                  | 6978 (CST)                           |
| Tri-Methyl-Histone H3 (Lys4) (C42D8) Rabbit monoclonal antibody          | 9751 (CST)                           |
| Histone H3 (96C10) Mouse monoclonal antibody                             | 3638 (CST)                           |
| CD31 (PECAM-1) (89C2) Mouse monoclonal antibody                          | 3528 (CST)                           |
| Alpha-Smooth Muscle Actin (D4K9N) XP(R) Antibody                         | 19245 (CST)                          |
| VE-Cadherin (D87F2) XP(R) Rabbit monoclonal antibody                     | 2500 (CST)                           |
| Snail (C15D3) Rabbit monoclonal antibody                                 | 3879 (CST)                           |
| Slug (C19G7) Rabbit monoclonal antibody                                  | 9585 (CST)                           |
| SET1A (D3V9S) Rabbit monoclonal antibody                                 | 61702 (CST)                          |
| MLL1 (D2M7U) Rabbit monoclonal antibody (Amino-terminal Antigen)         | 14689 (CST)                          |
| MLL1 (D6G8N) Rabbit monoclonal antibody (Carboxy-terminal Antigen)       | 14197 (CST)                          |
| MLL2/KMT2B (D6X2E) Rabbit monoclonal antibody (Carboxy-terminal Antigen) | 63735 (CST)                          |
| WDR82 (D2I3B) Rabbit monoclonal antibody                                 | 99715 (CST)                          |
| Menin (D45B1) XP® Rabbit monoclonal antibody                             | 6891 (CST)                           |
| c-Myc (D84C12) Rabbit monoclonal antibody                                | 5605 (CST)                           |
| Di-Methyl-Histone H3 (Lys4) (C64G9) Rabbit monoclonal antibody           | 9725 (CST)                           |
| Mono-Methyl-Histone H3 (Lys4) (D1A9) XP® Rabbit monoclonal antibody      | 5326 (CST)                           |
| KLF2 Rabbit Polyclonal Antibody                                          | PA5-40591 (Thermo Fisher Scientific) |
| ADAM10 Rabbit Polyclonal Antibody                                        | 14194 (CST)                          |
| GAPDH (D16H11) XP® Rabbit monoclonal antibody                            | 5174 (CST)                           |

|                                                    |             |
|----------------------------------------------------|-------------|
| $\beta$ -Tubulin (D3U1W) Mouse monoclonal antibody | 86298 (CST) |
| KLF4 Rabbit Polyclonal antibody                    | 4038 (CST)  |
| N-Cadherin (D4R1H) XP® Rabbit monoclonal antibody  | 13116 (CST) |
| Vimentin (D21H3) XP® Rabbit monoclonal antibody    | 5741 (CST)  |

**Supplemental Table 2. List of Primers used for quantification studies**

| <b>Gene name</b>            | <b>Forward sequence</b>    | <b>Reverse sequence</b>   |
|-----------------------------|----------------------------|---------------------------|
| <i>Jagged 1</i> gene        | 5`CCCCCTGTGAAGTGATTGAC3`   | 5`CCCGACTGACTCTTGCACTT3`  |
| <i>Jagged 2</i> gene        | 5`TGAAAAAACCTGATTGGCGG3`   | 5`CGACAGTCGTTGACGTTGAT3`  |
| <i>Jagged 1</i> promoter    | 5`GGCCAAAACCTTTGTCCACCC3`  | 5`GGGCTTGCTGTTGCATTTGA3`  |
| <i>Jagged 2</i> promoter    | 5`GGGAGATTCTCGGAGGAGGT3`   | 5`CTCGCAGTCCCAGAGGAGAT3`  |
| <i>Snai2</i> promoter       | 5`ACAGTGTCTTGAAAGGGAGC3`   | 5`TAGCAAACGAAGCTGCGAGA3`  |
| <i>ACTA2</i> promoter       | 5`GGTTCTTAAGTGGGGGCCAT3`   | 5`GTGCAGTCGTTAGTGCGGTA3`  |
| <i>Snai2</i> gene           | 5`AACAGTATGTGCCTTGGGGG3`   | 5`AAAAGGCACTTGGAAGGGGT3`  |
|                             | 5`GCTACCCAATGGCCTCTCTC3`   | 5`CTTCAATGGCATGGGGGTCT3`  |
| <i>FSP1 (S100A4)</i> gene   | 5`GACAGCAACAGGGACAACGA3`   | 5`TCAAGCACGTGTCTGAAGGA3`  |
| <i>Vimentin</i> gene        | 5`AAACTTAGGGGCGCTCTTGT3`   | 5`GAGGGCTCCTAGCGGTTTAG3`  |
| <i>Calponin (CNN1)</i> gene | 5`GAGGTTAAGAACAAGCTGGCCC3` | 5`GTTCTCAAACAGGTCGTTGGC3` |
| <i>Versican</i> gene        | 5`AGTGATGCGGGTCTTTACCG3`   | 5`GCGTCACACTGCTCAAATCC3`  |
